# Supplementary material
Source: PubMed Central journal article supplement (PMC153595)

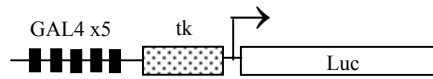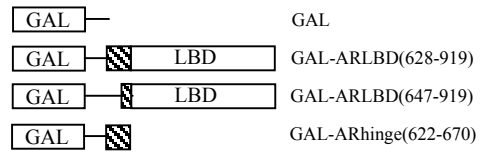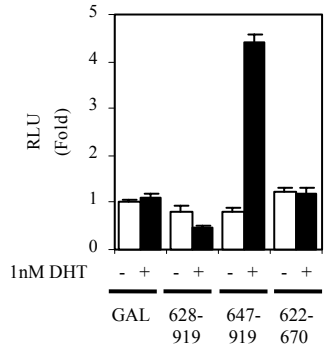

Supplement: pnas_0736237100_2.pdf [file pnas_0736237100_2.pdf]

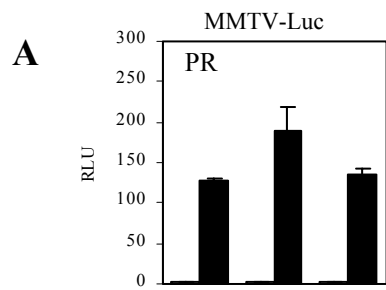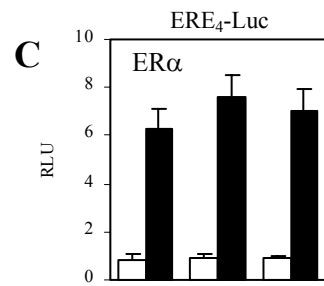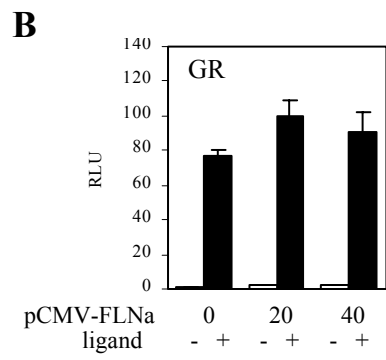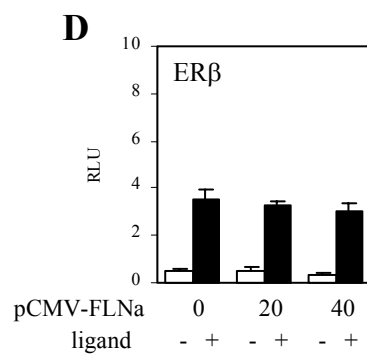

Supplement: pnas_0736237100_5.pdf [file pnas_0736237100_5.pdf]
